# Supplementary material for: A cobalt-containing pseudosandwich-type polyoxometalate based on a lacunary Lindqvist polyoxovanadate
Source: Royal Society of Chemistry journal article supplement (doi:10.1039/c3ce41278d), 2013-12-02
Supplement: c3ce41278d.pdf [file c3ce41278d.pdf]

## Supporting Information

### **Cobalt-Containing Pesudosandwich-Type Polyoxometalate Based on Lacunary Lindqvist Polyoxovanadate**

Yue Liang,<sup>a</sup> Zhi-Ming Zhang,<sup>\*a</sup> Zhu-Jun Liu,<sup>a</sup> Ying Zhang,<sup>a</sup> Jun Zhang<sup>a</sup> and En-Bo  
Wang<sup>\*a</sup>

**Table S1.** Bond Valence Sum Calculations for **1**

| atom                    | V(1)      | V(2)      | V(3)      |
|-------------------------|-----------|-----------|-----------|
|                         | 1.70307   | 1.763971  | 1.778332  |
|                         | 1.108162  | 0.845719  | 0.975969  |
| Based on $r_o(V^{5+})$  | 0.792603  | 0.845719  | 0.866543  |
|                         | 0.664907  | 0.69429   | 0.624833  |
|                         | 0.436167  | 0.69429   | 0.519934  |
|                         | 0.307777  | 0.249952  | 0.283807  |
|                         | =5.012687 | =5.093943 | =5.049419 |
|                         | Co(1)     | Co(2)     | Co(3)     |
|                         | 0.569975  | 0.545853  | 0.370874  |
| Based on $r_o(Co^{3+})$ | 0.569975  | 0.541445  | 0.370874  |
|                         | 0.51019   | 0.495245  | 0.357103  |
|                         | 0.51019   | 0.495245  | 0.357103  |
|                         | 0.51019   | 0.588764  | 0.291582  |
|                         | 0.51019   | 0.588764  | 0.291582  |
|                         | =3.180709 | =3.255316 | =2.039121 |

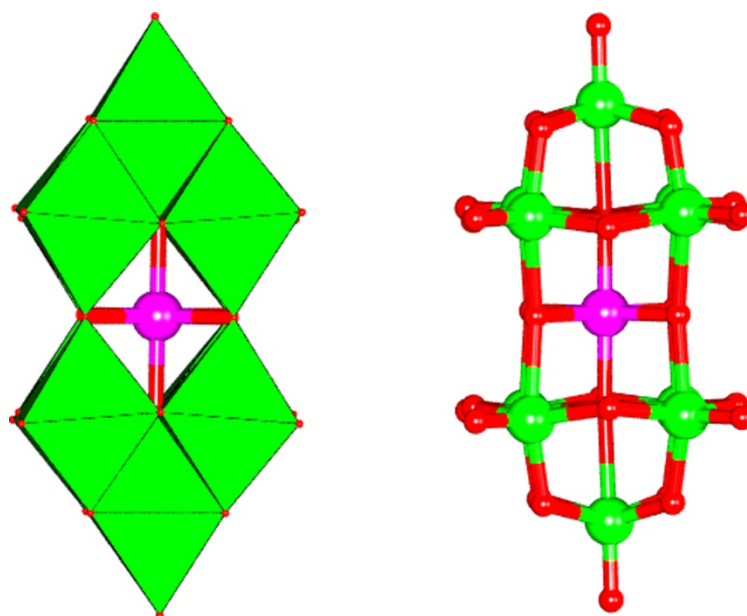

**Fig. S1.** View of  $[\text{CoV}_{10}\text{O}_{32}]$  anion in **1**.

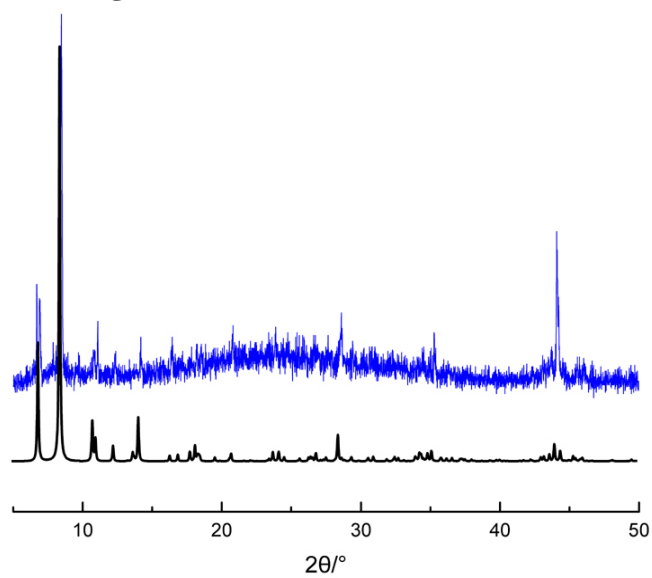

**Fig. S2.** PXRD patterns of compound **1**: blue as-synthesized; black simulated.

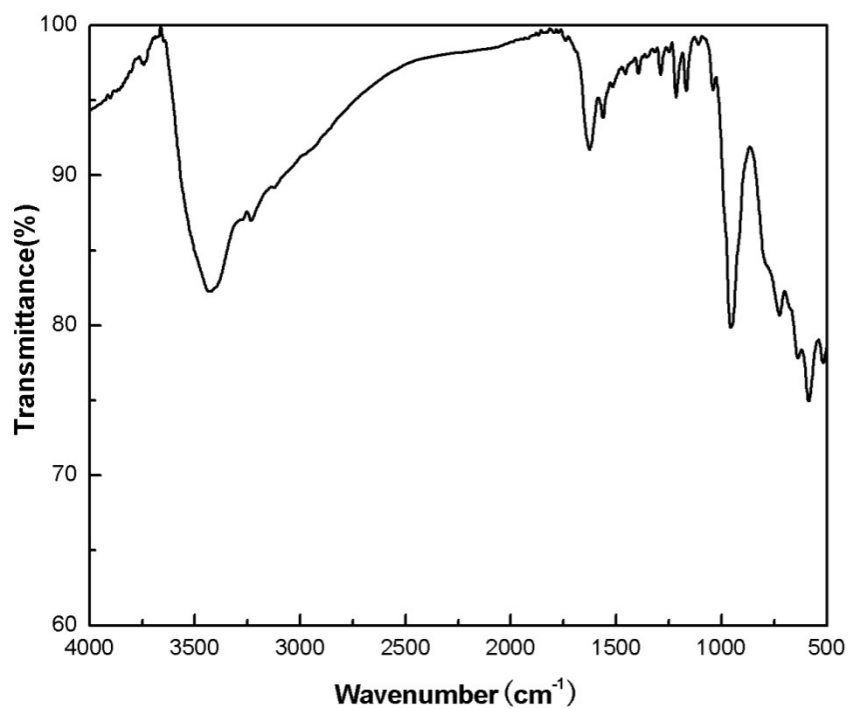

**Fig. S3.** IR spectrum of compound **1**.

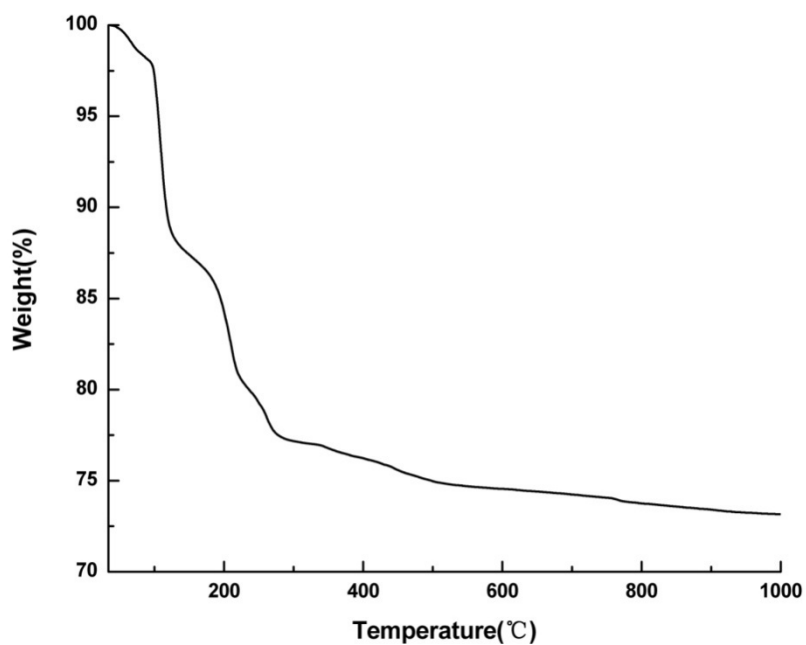

**Fig. S4.** The TG curve of compound **1**.
